# Supplementary material for: Evidence for clinician underprescription of and patient non-adherence to guideline-recommended cardiovascular medications among adults with peripheral artery disease: protocol for a systematic review and meta-analysis
Source: PubMed Central journal article supplement — BMJ Open. 2024 Mar 21;14(3):e076795. doi: 10.1136/bmjopen-2023-076795 (PMC10961494; doi:10.1136/bmjopen-2023-076795), 2024-03-21
Supplement: bmjopen-2023-076795supp002.pdf [file bmjopen-2023-076795supp002.pdf]

## Evidence for Underprescription of and Non-Adherence to Guideline-Recommended Cardiovascular Medications in Adults with Peripheral Artery Disease: Protocol for a Systematic Review and Meta-Analysis

### Sex and Gender Equity in Research (SAGER) checklist

| ✓                                     | Checklist item                                                                                                                                                                                                                                                                                                                                                                                                                                                                                                                       | Reported on section   |
|---------------------------------------|--------------------------------------------------------------------------------------------------------------------------------------------------------------------------------------------------------------------------------------------------------------------------------------------------------------------------------------------------------------------------------------------------------------------------------------------------------------------------------------------------------------------------------------|-----------------------|
| <b>General</b>                        |                                                                                                                                                                                                                                                                                                                                                                                                                                                                                                                                      |                       |
| Yes                                   | The terms sex/gender used appropriately                                                                                                                                                                                                                                                                                                                                                                                                                                                                                              | Introduction, methods |
| <b>Title</b>                          |                                                                                                                                                                                                                                                                                                                                                                                                                                                                                                                                      |                       |
| N/A                                   | Title specifies the sex/gender of participants if only one included                                                                                                                                                                                                                                                                                                                                                                                                                                                                  | N/A                   |
| <b>Abstract</b>                       |                                                                                                                                                                                                                                                                                                                                                                                                                                                                                                                                      |                       |
| N/A                                   | Abstract specifies the sex/gender of participants if only one included                                                                                                                                                                                                                                                                                                                                                                                                                                                               | N/A                   |
| N/A                                   | Study population described with sex/gender breakdown*                                                                                                                                                                                                                                                                                                                                                                                                                                                                                | N/A                   |
| <b>Introduction</b>                   |                                                                                                                                                                                                                                                                                                                                                                                                                                                                                                                                      |                       |
| Yes                                   | If relevant, previous studies that show presence or lack of sex/gender differences or similarities are cited                                                                                                                                                                                                                                                                                                                                                                                                                         | Introduction          |
| Yes                                   | Mention of whether sex/gender might be an important variant and if differences might be expected                                                                                                                                                                                                                                                                                                                                                                                                                                     | Introduction          |
| N/A                                   | The demographics of the study population with regard to sex/gender (eg, disease prevalence among male/female study participants) are outlined*                                                                                                                                                                                                                                                                                                                                                                                       | N/A                   |
| <b>Methods</b>                        |                                                                                                                                                                                                                                                                                                                                                                                                                                                                                                                                      |                       |
| Yes                                   | Method of definition of sex/gender (eg, self-report, genetic testing)                                                                                                                                                                                                                                                                                                                                                                                                                                                                | Methods               |
| Yes                                   | Description of how sex/gender was considered in the design, whether authors ensured adequate representation of male and female study participants, justification of the reasons for any exclusion of male or female participants, or explanation if not considered. Justification of other sex/gender-specific interventions of study designs (eg, mandating contraception for women).* Explicit reporting of the scientific rationale for contraception requirements and exclusions for pregnancy and lactation should be required* | Methods               |
| <b>Results (N/A – protocol paper)</b> |                                                                                                                                                                                                                                                                                                                                                                                                                                                                                                                                      |                       |
| <b>Discussion</b>                     |                                                                                                                                                                                                                                                                                                                                                                                                                                                                                                                                      |                       |
| Yes                                   | Potential implications of sex/gender on the study results and analyses, including the extent to which the findings can be generalized to all sexes/genders in a population                                                                                                                                                                                                                                                                                                                                                           | Yes                   |

|     |                                                                                                                                                          |     |
|-----|----------------------------------------------------------------------------------------------------------------------------------------------------------|-----|
| N/A | If a sex/gender analysis not done, a rationale is given and implications of the lack of such analysis on the interpretation of the results are discussed | N/A |
|-----|----------------------------------------------------------------------------------------------------------------------------------------------------------|-----|

Adapted from SAGER guidelines. Sex and Gender Equity in Research: rationale for the SAGER guidelines and recommended use. Research Integrity and Peer Review 1, Article number: 2 (2016) <https://researchintegrityjournal.biomedcentral.com/articles/10.1186/s41073-016-0007-6>.

\* These points extend beyond the original SAGER table

Source: <https://ease.org.uk/wp-content/uploads/2023/01/EASE-SAGER-Checklist-2022.pdf>
